# Supplementary material
Source: publisher site journal article supplement (https://www.degruyterbrill.com/publication/isbn/9783486718133/downloadAsset/9783486718133_Buchinformation.pdf)
Supplement: Supplementary file 1 [file 9783486718133_Buchinformation.pdf]

Oldenbourg Wissenschaftsverlag  
Pressereferat / Ulrike Staudinger  
Rosenheimer Str. 145  
81671 München  
Telefon: 089/45051-211, Fax: -204  
presse-w@oldenbourg.de  
www.oldenbourg.de

## **Akten zur Auswärtigen Politik der Bundesrepublik Deutschland 1974**

Herausgegeben im Auftrag des Auswärtigen Amts vom Institut für Zeitgeschichte. Hauptherausgeber Hans-Peter Schwarz, Mitherausgeber Helga Haftendorn, Klaus Hildebrand, Werner Link, Horst Möller und Rudolf Morsey

Bearbeitet von Daniela Taschler, Fabian Hilfrich und Michael Ploetz

Wissenschaftliche Leiterin: Ilse Dorothee Pautsch

2005. 2 Bände, LXXVIII, 1.805 S., €120,-  
(Fortsetzungspreis €99,80)  
ISBN 978-3-486-57558-3

Das Jahr 1974 brachte einen doppelten Führungswechsel in Bonn: Bundeskanzler Brandt musste wegen der Agenten-affäre Guillaume zurücktreten und Außenminister Scheel übernahm das Amt des Bundespräsidenten. Fortan bestimmten Helmut Schmidt und Hans-Dietrich Genscher den außenpolitischen Kurs. Neben fortdauernden Spannungen in den transatlantischen Beziehungen, den Nachwirkungen der Energiekrise und der stagnierenden Europapolitik prägten weiterhin ungeklärte Probleme in den Beziehungen zur UdSSR, zu Polen und zur DDR die Außenpolitik der Bundesregierung. Weitere Schwerpunkte bildeten die KSZE und die MBFR-Verhandlungen.

Akten zur  
Auswärtigen Politik  
der Bundesrepublik  
Deutschland  
**1974**  
**1. Januar bis**  
**30. Juni**

Herausgegeben  
im Auftrag des Auswärtigen Amts  
vom Institut für Zeitgeschichte

Oldenbourg

### **Zur Edition:**

- Die Edition erscheint seit 1993 jährlich in zwei bis drei Bänden.
- Veröffentlicht wird bisher unzugängliches Material nach Ablauf der Sperrfrist von 30 Jahren, darunter auch Bestände, die als „geheim“ oder „streng geheim“ klassifiziert waren. Das Herausbergremium trägt in wissenschaftlicher Unabhängigkeit die Verantwortung für Auswahl und Kommentierung der Akten. Die Edition unterscheidet sich dadurch maßgeblich von vergleichbaren Projekten in anderen Ländern.
- Die Dokumente sind in chronologischer Reihenfolge abgedruckt. Die Register des Dokumentenverzeichnisses, eine Zeittafel, die Personen- und Sachregister vereinfachen die Benutzung des Werkes. Aus der Kommentierung geht u.a. hervor, welche Beachtung das jeweils edierte Dokument auf den verschiedenen Entscheidungsebenen des Auswärtigen Amts bzw. außerhalb dieser Behörde gefunden hat.
